# Supplementary material for: Interpreting the 13 C/ 12 C ratio of carbon dioxide in an urban airshed in the Yangtze River Delta, China
Source: Copernicus journal article supplement (doi:10.5194/acp-2016-349), 2016-05-09
Supplement: Supplementary file 1 [file data_supplement.xls]

## Sheet: Data
Year	Day	Hour	Total CO2	δ13C
a	d	hr	ppm	‰
2013	57	1	-9999	-9999
2013	57	2	-9999	-9999
2013	57	3	441.662	-8.92483
2013	57	4	444.759	-9.30567
2013	57	5	439.299	-9.0768
2013	57	6	441.48	-9.26788
2013	57	7	440.402	-9.21158
2013	57	8	431.378	-8.83643
2013	57	9	426.625	-8.63082
2013	57	10	419.496	-8.37224
2013	57	11	416.899	-8.23629
2013	57	12	415.299	-8.15005
2013	57	13	416.196	-8.04075
2013	57	14	413.192	-7.89493
2013	57	15	414.37	-7.98868
2013	57	16	419.101	-7.91979
2013	57	17	420.151	-7.96008
2013	57	18	421.002	-8.07728
2013	57	19	422.016	-8.58665
2013	57	20	429.604	-8.96216
2013	57	21	424.366	-8.72881
2013	57	22	418.085	-8.17428
2013	57	23	418.825	-8.23639
2013	57	24	425.988	-8.69478
2013	58	1	435.654	-8.90069
2013	58	2	427.553	-8.72315
2013	58	3	420.532	-8.46522
2013	58	4	417.716	-8.73237
2013	58	5	419.485	-8.79249
2013	58	6	434.439	-9.29836
2013	58	7	435.66	-8.88766
2013	58	8	434.961	-8.73813
2013	58	9	438.851	-8.95905
2013	58	10	441.15	-9.54018
2013	58	11	475.07	-10.9352
2013	58	12	483.894	-11.0435
2013	58	13	456.092	-9.49895
2013	58	14	499.723	-10.9457
2013	58	15	467.139	-9.85153
2013	58	16	455.376	-9.45702
2013	58	17	442.146	-9.04316
2013	58	18	434.891	-8.84192
2013	58	19	447.477	-9.35041
2013	58	20	451.028	-9.52321
2013	58	21	439.124	-9.1103
2013	58	22	447.499	-9.39339
2013	58	23	450.112	-9.52934
2013	58	24	442.499	-9.19972
2013	59	1	492.343	-10.9718
2013	59	2	467.163	-10.2287
2013	59	3	490.186	-11.0178
2013	59	4	485.379	-10.5461
2013	59	5	464.902	-9.96382
2013	59	6	436.907	-8.97659
2013	59	7	458.625	-9.88666
2013	59	8	455.753	-9.73856
2013	59	9	434.904	-8.89188
2013	59	10	434.111	-9.01086
2013	59	11	436.632	-9.05363
2013	59	12	429.977	-8.8132
2013	59	13	433.193	-8.77885
2013	59	14	434.841	-8.8895
2013	59	15	440.748	-9.00772
2013	59	16	447.17	-9.26505
2013	59	17	453.94	-9.37536
2013	59	18	446.25	-9.06698
2013	59	19	450.192	-9.16669
2013	59	20	460.172	-9.48491
2013	59	21	467.11	-9.85943
2013	59	22	448.662	-9.51034
2013	59	23	447.677	-9.48827
2013	59	24	445.801	-9.31527
2013	60	1	436.535	-8.86207
2013	60	2	433.544	-8.68829
2013	60	3	429.658	-8.54829
2013	60	4	423.892	-8.10254
2013	60	5	420.365	-8.15646
2013	60	6	415.452	-8.25495
2013	60	7	412.48	-8.68526
2013	60	8	413.533	-8.73232
2013	60	9	413.257	-8.72952
2013	60	10	408.961	-8.27188
2013	60	11	406.791	-8.34986
2013	60	12	404.301	-8.25686
2013	60	13	403.233	-8.10814
2013	60	14	403.86	-8.25689
2013	60	15	403.558	-8.16582
2013	60	16	404.849	-8.00355
2013	60	17	406.506	-8.02504
2013	60	18	408.879	-8.35451
2013	60	19	408.569	-8.20473
2013	60	20	417.856	-8.48686
2013	60	21	425.145	-8.69073
2013	60	22	419.967	-8.85564
2013	60	23	418.547	-8.76671
2013	60	24	433.019	-9.24083
2013	61	1	434.371	-8.98089
2013	61	2	422.04	-8.62719
2013	61	3	417.863	-8.46715
2013	61	4	407.666	-8.20199
2013	61	5	408.152	-8.19972
2013	61	6	408.674	-8.07056
2013	61	7	408.669	-8.01363
2013	61	8	408.643	-8.09698
2013	61	9	408.858	-8.14151
2013	61	10	417.16	-8.48744
2013	61	11	416.85	-8.49515
2013	61	12	432.429	-9.10832
2013	61	13	411.43	-8.26051
2013	61	14	404.203	-7.94668
2013	61	15	403.915	-7.75868
2013	61	16	404.382	-7.50407
2013	61	17	404.155	-7.52265
2013	61	18	403.291	-7.56437
2013	61	19	402.922	-7.96894
2013	61	20	415.482	-8.63388
2013	61	21	438.986	-9.41038
2013	61	22	441.178	-9.59322
2013	61	23	419.235	-9.01722
2013	61	24	412.797	-8.65348
2013	62	1	417.127	-8.51671
2013	62	2	418.686	-8.66931
2013	62	3	417.809	-8.69539
2013	62	4	420.361	-8.35634
2013	62	5	420.317	-8.51048
2013	62	6	418.745	-8.20397
2013	62	7	423.561	-8.36698
2013	62	8	424.264	-8.39272
2013	62	9	422.301	-8.428
2013	62	10	416.338	-8.36005
2013	62	11	412.161	-8.06391
2013	62	12	410.333	-7.99704
2013	62	13	409.927	-8.15481
2013	62	14	411.378	-8.18014
2013	62	15	411.588	-8.1875
2013	62	16	410.085	-8.18264
2013	62	17	410.775	-8.1917
2013	62	18	410.798	-8.1259
2013	62	19	413.28	-8.3025
2013	62	20	416.196	-8.34965
2013	62	21	424.615	-8.60107
2013	62	22	427.862	-8.90063
2013	62	23	428.497	-8.95174
2013	62	24	429.099	-8.88202
2013	63	1	426.964	-9.17286
2013	63	2	426.361	-9.03348
2013	63	3	427.595	-8.91954
2013	63	4	427.142	-8.40384
2013	63	5	428.211	-8.59042
2013	63	6	424.956	-8.51373
2013	63	7	425.293	-8.63077
2013	63	8	426.458	-8.73937
2013	63	9	427.066	-8.68647
2013	63	10	425.302	-8.53643
2013	63	11	420.934	-8.4524
2013	63	12	414.248	-8.28352
2013	63	13	408.821	-7.90163
2013	63	14	407.027	-7.75445
2013	63	15	406.861	-7.77413
2013	63	16	407.374	-8.01387
2013	63	17	408.971	-8.05693
2013	63	18	411.046	-8.34067
2013	63	19	433.407	-9.205
2013	63	20	423.058	-8.82452
2013	63	21	426.104	-8.83093
2013	63	22	430.189	-9.05175
2013	63	23	442.299	-9.49562
2013	63	24	444.163	-9.45764
2013	64	1	447.031	-9.73383
2013	64	2	458.145	-10.1531
2013	64	3	464.82	-10.3356
2013	64	4	478.327	-10.8203
2013	64	5	517.344	-11.845
2013	64	6	522.815	-12.1561
2013	64	7	461.875	-10.5224
2013	64	8	449.596	-10.0467
2013	64	9	447.724	-9.92655
2013	64	10	454.823	-9.79516
2013	64	11	461.771	-9.99989
2013	64	12	447.532	-9.37947
2013	64	13	434.526	-8.58366
2013	64	14	430.108	-8.50786
2013	64	15	431.066	-8.41547
2013	64	16	429.745	-8.49769
2013	64	17	419.866	-8.07692
2013	64	18	420.72	-8.08315
2013	64	19	435.634	-9.11145
2013	64	20	444.021	-9.28503
2013	64	21	468.173	-10.0529
2013	64	22	476.613	-10.3306
2013	64	23	453.603	-9.7185
2013	64	24	446.932	-9.53421
2013	65	1	438.326	-9.14461
2013	65	2	437.001	-9.08762
2013	65	3	435.426	-8.98672
2013	65	4	433.915	-8.97531
2013	65	5	437.889	-9.14563
2013	65	6	441.078	-9.18233
2013	65	7	446.315	-9.10383
2013	65	8	443.13	-8.96278
2013	65	9	438.068	-8.79257
2013	65	10	445.381	-9.07819
2013	65	11	436.865	-8.80376
2013	65	12	419.652	-8.20694
2013	65	13	414.281	-8.37706
2013	65	14	412.517	-8.3366
2013	65	15	405.236	-8.07098
2013	65	16	401.541	-7.23912
2013	65	17	402.622	-7.30082
2013	65	18	402.629	-7.43985
2013	65	19	-9999	-9999
2013	65	20	-9999	-9999
2013	65	21	413.209	-7.60443
2013	65	22	413.893	-7.78984
2013	65	23	414.994	-7.87373
2013	65	24	414.539	-7.91952
2013	66	1	417.283	-7.84893
2013	66	2	413.233	-8.59053
2013	66	3	414.384	-8.72407
2013	66	4	417.041	-8.84587
2013	66	5	419.714	-8.45016
2013	66	6	420.244	-8.47933
2013	66	7	422.201	-8.59946
2013	66	8	422.854	-8.88832
2013	66	9	424.292	-8.96063
2013	66	10	425.47	-8.95842
2013	66	11	426.457	-8.46028
2013	66	12	425.369	-8.33143
2013	66	13	423.258	-8.31567
2013	66	14	420.777	-8.215
2013	66	15	415.167	-8.2738
2013	66	16	413.017	-8.12061
2013	66	17	413.622	-8.21799
2013	66	18	419.384	-8.40167
2013	66	19	418.597	-8.27869
2013	66	20	433.452	-8.71537
2013	66	21	423.137	-8.33663
2013	66	22	416.966	-8.16563
2013	66	23	426.582	-8.61224
2013	66	24	426.948	-8.46002
2013	67	1	423.952	-8.33024
2013	67	2	425.158	-8.42828
2013	67	3	427.047	-8.54095
2013	67	4	428.164	-8.73494
2013	67	5	428.72	-8.72051
2013	67	6	427.368	-8.62612
2013	67	7	427.65	-8.57586
2013	67	8	427.387	-8.61459
2013	67	9	425.837	-8.59133
2013	67	10	423.965	-8.37711
2013	67	11	420.251	-8.29399
2013	67	12	410.132	-8.14115
2013	67	13	406.568	-8.01311
2013	67	14	407.653	-7.51297
2013	67	15	406.805	-7.47167
2013	67	16	407.027	-7.43386
2013	67	17	406.751	-7.46186
2013	67	18	411.913	-7.60055
2013	67	19	415.562	-7.79516
2013	67	20	426.651	-8.20387
2013	67	21	433.366	-8.71516
2013	67	22	425.87	-8.37791
2013	67	23	423.305	-8.01958
2013	67	24	422.425	-8.16027
2013	68	1	427.538	-8.25039
2013	68	2	430.397	-10.4177
2013	68	3	436.706	-8.71452
2013	68	4	442.729	-8.91586
2013	68	5	432.24	-8.65266
2013	68	6	433.784	-8.50164
2013	68	7	440.498	-8.73117
2013	68	8	443.734	-8.97845
2013	68	9	447.772	-9.15685
2013	68	10	445.39	-9.01226
2013	68	11	441.369	-9.01221
2013	68	12	426.783	-8.70078
2013	68	13	415.736	-8.19974
2013	68	14	410.48	-7.83925
2013	68	15	406.219	-7.75881
2013	68	16	406.268	-8.00105
2013	68	17	406.477	-7.88137
2013	68	18	407.968	-7.78261
2013	68	19	410.637	-7.85943
2013	68	20	416.457	-7.92735
2013	68	21	420.27	-8.29665
2013	68	22	417.238	-8.20153
2013	68	23	423.983	-8.2616
2013	68	24	421.558	-8.29286
2013	69	1	428.585	-8.70971
2013	69	2	433.133	-8.86571
2013	69	3	421.891	-8.57555
2013	69	4	418.721	-8.52957
2013	69	5	410.002	-8.30087
2013	69	6	408.506	-8.36897
2013	69	7	409.153	-8.50377
2013	69	8	415.721	-8.54526
2013	69	9	414.383	-8.60641
2013	69	10	417.071	-8.75491
2013	69	11	414.465	-8.55288
2013	69	12	414.024	-8.65404
2013	69	13	414.194	-8.66448
2013	69	14	414.649	-8.69826
2013	69	15	408.701	-8.39558
2013	69	16	408.592	-8.48363
2013	69	17	409.188	-8.41368
2013	69	18	404.23	-8.10899
2013	69	19	404.665	-8.14137
2013	69	20	408.885	-8.2156
2013	69	21	415.093	-8.37646
2013	69	22	415.13	-8.2628
2013	69	23	410.616	-8.11623
2013	69	24	416.22	-8.34312
2013	70	1	416.825	-8.29131
2013	70	2	417.764	-8.38853
2013	70	3	424.997	-8.80246
2013	70	4	426.032	-8.88637
2013	70	5	424.953	-8.89473
2013	70	6	426.155	-9.04504
2013	70	7	426.041	-9.16959
2013	70	8	428.423	-9.21496
2013	70	9	430.355	-9.14898
2013	70	10	429.792	-9.07924
2013	70	11	432.111	-9.21844
2013	70	12	442.376	-9.56518
2013	70	13	438.981	-9.54403
2013	70	14	430.245	-9.09104
2013	70	15	426.19	-8.99094
2013	70	16	424.046	-8.92107
2013	70	17	426.649	-8.98689
2013	70	18	430.925	-9.36886
2013	70	19	433.56	-9.40048
2013	70	20	436.178	-9.51764
2013	70	21	434.86	-9.44003
2013	70	22	438.754	-9.55714
2013	70	23	459.295	-10.3594
2013	70	24	450.555	-9.61105
2013	71	1	460.257	-9.825
2013	71	2	451.426	-9.64894
2013	71	3	453.139	-9.83816
2013	71	4	470.376	-10.2659
2013	71	5	466.169	-10.0808
2013	71	6	443.688	-9.63071
2013	71	7	437.762	-9.5831
2013	71	8	442.168	-9.60188
2013	71	9	443.778	-9.59458
2013	71	10	447.088	-9.52725
2013	71	11	440.358	-9.31347
2013	71	12	434.375	-8.99738
2013	71	13	432.557	-8.77646
2013	71	14	438.599	-9.033
2013	71	15	437.801	-8.86461
2013	71	16	422.101	-8.07203
2013	71	17	414.543	-7.78861
2013	71	18	416.413	-7.71899
2013	71	19	418.855	-8.09518
2013	71	20	420.216	-8.32183
2013	71	21	423.168	-8.5218
2013	71	22	425.367	-8.63074
2013	71	23	425.087	-8.69808
2013	71	24	420.908	-8.32149
2013	72	1	427.402	-8.64352
2013	72	2	435.045	-8.85809
2013	72	3	438.238	-9.03017
2013	72	4	435.951	-8.74982
2013	72	5	435.765	-8.81997
2013	72	6	434.689	-8.8803
2013	72	7	432.737	-8.61137
2013	72	8	428.528	-8.32277
2013	72	9	424.55	-8.40973
2013	72	10	421.929	-8.29918
2013	72	11	423.674	-8.41807
2013	72	12	420.946	-8.5636
2013	72	13	418.699	-8.3872
2013	72	14	413.305	-8.29301
2013	72	15	412.057	-8.23229
2013	72	16	412.34	-8.21901
2013	72	17	409.041	-8.10566
2013	72	18	406.527	-8.12215
2013	72	19	406.726	-8.18614
2013	72	20	407.026	-8.24336
2013	72	21	406.424	-7.71213
2013	72	22	410.04	-7.74278
2013	72	23	424.842	-8.6455
2013	72	24	426.261	-8.80848
2013	73	1	425.524	-8.93519
2013	73	2	426.005	-9.01605
2013	73	3	417.847	-8.67067
2013	73	4	421.724	-8.73681
2013	73	5	421.172	-8.90081
2013	73	6	417.34	-8.98116
2013	73	7	415.412	-8.95925
2013	73	8	418.316	-8.98847
2013	73	9	425.789	-9.12908
2013	73	10	421.587	-8.70392
2013	73	11	457.639	-10.026
2013	73	12	462.606	-10.6636
2013	73	13	445.258	-10.17
2013	73	14	445.552	-10.1031
2013	73	15	440.42	-9.83079
2013	73	16	464.016	-10.5372
2013	73	17	449.032	-10.0226
2013	73	18	431.73	-9.13805
2013	73	19	419.415	-8.6175
2013	73	20	425.47	-8.71896
2013	73	21	443.946	-9.63557
2013	73	22	434.497	-9.26873
2013	73	23	437.21	-9.44735
2013	73	24	438.974	-9.11531
2013	74	1	436.469	-8.94889
2013	74	2	445.567	-9.40906
2013	74	3	433.473	-8.84362
2013	74	4	433.709	-8.80404
2013	74	5	450.162	-9.53375
2013	74	6	446.84	-9.72766
2013	74	7	452.126	-9.88511
2013	74	8	450.705	-9.98642
2013	74	9	456.108	-10.0214
2013	74	10	479.738	-10.6909
2013	74	11	475.462	-10.6153
2013	74	12	471.891	-10.3838
2013	74	13	465.999	-10.1241
2013	74	14	457.389	-9.78961
2013	74	15	454.74	-10.0852
2013	74	16	433.568	-9.24152
2013	74	17	434.119	-9.21747
2013	74	18	437.221	-9.15254
2013	74	19	430.133	-8.87196
2013	74	20	441.941	-9.2998
2013	74	21	464.145	-9.82163
2013	74	22	441.536	-9.22826
2013	74	23	441.589	-9.0381
2013	74	24	443.756	-8.96295
2013	75	1	450.539	-9.06962
2013	75	2	449.784	-9.39831
2013	75	3	472.293	-9.86659
2013	75	4	471.691	-9.78912
2013	75	5	463.479	-9.63016
2013	75	6	463.926	-10.2524
2013	75	7	473.257	-10.5944
2013	75	8	479.354	-10.9079
2013	75	9	477.562	-10.298
2013	75	10	485.601	-10.3851
2013	75	11	486.074	-10.3053
2013	75	12	478.627	-10.3941
2013	75	13	464.289	-9.75766
2013	75	14	451.568	-9.3585
2013	75	15	462.974	-9.95728
2013	75	16	463.014	-10.014
2013	75	17	447	-9.48039
2013	75	18	443.627	-9.21538
2013	75	19	453.092	-9.45429
2013	75	20	458.587	-9.76008
2013	75	21	461.115	-9.7623
2013	75	22	457.013	-9.64637
2013	75	23	460.727	-9.66993
2013	75	24	461.352	-9.55399
2013	76	1	468.566	-9.89734
2013	76	2	465.095	-9.96167
2013	76	3	443.067	-9.31745
2013	76	4	429.468	-8.98158
2013	76	5	437.858	-9.28334
2013	76	6	462.517	-9.61305
2013	76	7	457.508	-9.3896
2013	76	8	458.857	-9.43082
2013	76	9	463.829	-9.44799
2013	76	10	452.904	-9.27878
2013	76	11	452.155	-9.12039
2013	76	12	449.986	-9.31438
2013	76	13	444.1	-9.2902
2013	76	14	441.717	-9.04901
2013	76	15	441.319	-8.68364
2013	76	16	444.486	-8.73625
2013	76	17	446.357	-8.90895
2013	76	18	441.899	-9.118
2013	76	19	435.695	-9.11222
2013	76	20	431.353	-8.97363
2013	76	21	431.243	-9.06573
2013	76	22	433.198	-9.07656
2013	76	23	435.408	-9.13215
2013	76	24	438.722	-8.83667
2013	77	1	435.985	-8.66808
2013	77	2	428.704	-8.28858
2013	77	3	425.106	-8.30459
2013	77	4	426.67	-8.36042
2013	77	5	424.712	-8.31316
2013	77	6	424.234	-8.05543
2013	77	7	428.346	-8.31182
2013	77	8	425.514	-8.15897
2013	77	9	428.894	-8.75823
2013	77	10	436.613	-9.12509
2013	77	11	438.274	-8.89215
2013	77	12	437.231	-8.24685
2013	77	13	434.809	-8.1571
2013	77	14	432.124	-7.98167
2013	77	15	426.135	-7.69525
2013	77	16	422.051	-7.57396
2013	77	17	413.222	-7.47093
2013	77	18	413.718	-7.83968
2013	77	19	419.436	-8.0472
2013	77	20	422.266	-8.14558
2013	77	21	421.721	-7.993
2013	77	22	419.764	-7.86878
2013	77	23	422.898	-8.08252
2013	77	24	428.534	-8.18226
2013	78	1	427.612	-8.0914
2013	78	2	428.013	-8.07563
2013	78	3	440.213	-8.81797
2013	78	4	452.179	-9.31056
2013	78	5	451.037	-9.30437
2013	78	6	453.252	-9.21467
2013	78	7	474.032	-9.91903
2013	78	8	513.595	-11.1644
2013	78	9	491.394	-10.5996
2013	78	10	468.607	-9.98154
2013	78	11	457.844	-9.45535
2013	78	12	443.728	-9.08088
2013	78	13	430.38	-8.65961
2013	78	14	439.074	-8.84056
2013	78	15	449.336	-9.04302
2013	78	16	454.352	-9.26805
2013	78	17	440.154	-8.85819
2013	78	18	437.646	-8.53503
2013	78	19	434.438	-8.36634
2013	78	20	440.887	-8.51128
2013	78	21	453.433	-8.89273
2013	78	22	463.721	-9.43864
2013	78	23	475.039	-9.68443
2013	78	24	477.469	-10.2791
2013	79	1	466.79	-10.0055
2013	79	2	467.023	-10.1165
2013	79	3	480.871	-10.4299
2013	79	4	469.79	-9.94836
2013	79	5	454.757	-9.46723
2013	79	6	439.925	-8.92108
2013	79	7	435.628	-8.87423
2013	79	8	426.681	-8.69808
2013	79	9	412.854	-8.38699
2013	79	10	409.523	-8.23291
2013	79	11	408.547	-8.08993
2013	79	12	407.348	-8.67895
2013	79	13	408.555	-8.79313
2013	79	14	409.208	-8.82628
2013	79	15	407.509	-8.48954
2013	79	16	408.074	-8.24745
2013	79	17	406.814	-8.20713
2013	79	18	409.537	-8.14718
2013	79	19	409.135	-8.06576
2013	79	20	409.598	-8.00673
2013	79	21	414.326	-8.48138
2013	79	22	418.03	-8.61044
2013	79	23	416.759	-8.59447
2013	79	24	422.48	-8.53108
2013	80	1	423.764	-8.40955
2013	80	2	434.991	-8.95945
2013	80	3	440.439	-9.34638
2013	80	4	434.132	-9.03005
2013	80	5	434.559	-9.06942
2013	80	6	458.88	-9.62254
2013	80	7	456.362	-9.41355
2013	80	8	490.918	-10.3385
2013	80	9	460.163	-9.65267
2013	80	10	428.317	-8.52121
2013	80	11	425.353	-8.41624
2013	80	12	425.376	-8.53535
2013	80	13	427.227	-8.66163
2013	80	14	431.927	-8.7291
2013	80	15	436.849	-8.81081
2013	80	16	424.123	-8.40341
2013	80	17	426.298	-8.4679
2013	80	18	430.594	-8.18357
2013	80	19	433.385	-8.2388
2013	80	20	442.868	-9.12554
2013	80	21	465.038	-9.71176
2013	80	22	466.995	-9.83121
2013	80	23	459.2	-9.871
2013	80	24	468.777	-10.2366
2013	81	1	456.793	-9.70181
2013	81	2	447.926	-9.21195
2013	81	3	447.01	-9.15243
2013	81	4	448.158	-9.28567
2013	81	5	447.702	-9.52611
2013	81	6	447.693	-9.50708
2013	81	7	447.381	-9.38741
2013	81	8	442.477	-9.19383
2013	81	9	444.05	-9.28792
2013	81	10	450.193	-9.39913
2013	81	11	452.224	-9.55882
2013	81	12	449.025	-9.21297
2013	81	13	445.505	-8.91368
2013	81	14	431.12	-7.99451
2013	81	15	434.621	-8.16987
2013	81	16	431.559	-8.35604
2013	81	17	423.896	-8.1525
2013	81	18	429.287	-8.62903
2013	81	19	431.032	-8.78131
2013	81	20	439.217	-9.02591
2013	81	21	426.371	-8.54835
2013	81	22	423.451	-8.49816
2013	81	23	409.991	-8.15574
2013	81	24	411.669	-8.18431
2013	82	1	412.658	-8.33749
2013	82	2	421.275	-8.80298
2013	82	3	417.379	-8.64735
2013	82	4	421.301	-8.74484
2013	82	5	429.954	-8.92543
2013	82	6	428.809	-8.84961
2013	82	7	429.916	-8.93716
2013	82	8	430.103	-9.16535
2013	82	9	429.633	-9.1552
2013	82	10	434.398	-9.28315
2013	82	11	439.883	-9.05283
2013	82	12	439.244	-8.91237
2013	82	13	440.543	-8.87603
2013	82	14	429.344	-8.98016
2013	82	15	435.959	-9.19576
2013	82	16	437.701	-9.25236
2013	82	17	440.065	-8.96624
2013	82	18	447.279	-9.24082
2013	82	19	446.316	-9.19313
2013	82	20	449.133	-9.48959
2013	82	21	441.113	-9.14211
2013	82	22	446.725	-9.34135
2013	82	23	451.31	-9.47066
2013	82	24	455.866	-9.62226
2013	83	1	448.107	-9.52215
2013	83	2	444.672	-9.33379
2013	83	3	449.137	-9.38514
2013	83	4	460.429	-9.8286
2013	83	5	456.645	-9.59235
2013	83	6	446.039	-9.44721
2013	83	7	442.953	-9.35988
2013	83	8	441.307	-9.38372
2013	83	9	429.209	-8.93302
2013	83	10	426.517	-8.73915
2013	83	11	423.186	-8.63732
2013	83	12	420.291	-8.4582
2013	83	13	418.326	-8.38428
2013	83	14	414.7	-8.48227
2013	83	15	414.247	-8.30751
2013	83	16	414.677	-8.43562
2013	83	17	414.547	-8.4585
2013	83	18	413.795	-8.39124
2013	83	19	428.187	-9.04226
2013	83	20	429.897	-9.3151
2013	83	21	429.671	-9.24551
2013	83	22	419.801	-8.82885
2013	83	23	420.031	-8.58415
2013	83	24	421.408	-8.6052
2013	84	1	423.678	-8.84054
2013	84	2	429.615	-9.21058
2013	84	3	429.283	-9.24242
2013	84	4	431.191	-9.32489
2013	84	5	425.092	-8.83655
2013	84	6	424.044	-8.70887
2013	84	7	428.74	-8.8356
2013	84	8	434.389	-9.36207
2013	84	9	428.747	-9.16513
2013	84	10	439.135	-9.48671
2013	84	11	460.761	-10.0854
2013	84	12	468.049	-10.4118
2013	84	13	432.111	-9.25444
2013	84	14	419.947	-8.67557
2013	84	15	422.773	-8.66994
2013	84	16	446.042	-9.50567
2013	84	17	444.837	-9.49846
2013	84	18	423.695	-8.66875
2013	84	19	414.376	-8.29329
2013	84	20	419.586	-8.3354
2013	84	21	421.61	-8.50351
2013	84	22	422.562	-8.51776
2013	84	23	428.664	-8.6416
2013	84	24	441.178	-9.24852
2013	85	1	438.247	-9.03902
2013	85	2	438.782	-9.37081
2013	85	3	438.401	-9.29487
2013	85	4	441.155	-9.4016
2013	85	5	437.925	-8.97687
2013	85	6	446.645	-9.23366
2013	85	7	443.762	-9.13128
2013	85	8	454.013	-9.71313
2013	85	9	450.503	-9.70859
2013	85	10	452.519	-9.72984
2013	85	11	447.152	-9.45508
2013	85	12	441.075	-9.19666
2013	85	13	434.89	-9.12513
2013	85	14	445.43	-9.39985
2013	85	15	444.415	-9.36609
2013	85	16	442.869	-9.22118
2013	85	17	446.575	-9.42254
2013	85	18	446.633	-9.44862
2013	85	19	434.359	-8.99486
2013	85	20	434.766	-8.96138
2013	85	21	431.362	-8.96373
2013	85	22	428.75	-8.74735
2013	85	23	432.385	-9.20009
2013	85	24	450.183	-9.92474
2013	86	1	443.259	-9.706
2013	86	2	442.854	-9.47899
2013	86	3	442.971	-9.42771
2013	86	4	440.699	-9.52552
2013	86	5	444.821	-9.87082
2013	86	6	448.339	-9.95657
2013	86	7	452.591	-10.2308
2013	86	8	450.628	-10.0026
2013	86	9	449.687	-9.8477
2013	86	10	431.837	-9.13621
2013	86	11	450.491	-9.68323
2013	86	12	447.976	-9.59272
2013	86	13	425.358	-9.02286
2013	86	14	433.055	-8.77466
2013	86	15	447.447	-9.20602
2013	86	16	441.393	-8.93619
2013	86	17	428.446	-8.75519
2013	86	18	429.922	-8.82389
2013	86	19	441.056	-9.136
2013	86	20	420.477	-8.30592
2013	86	21	430.741	-8.45758
2013	86	22	444.357	-9.05689
2013	86	23	458.08	-9.78571
2013	86	24	469.235	-10.0767
2013	87	1	465.739	-10.201
2013	87	2	460.351	-9.76658
2013	87	3	460.189	-9.6741
2013	87	4	456.934	-9.51771
2013	87	5	455.498	-9.5143
2013	87	6	456.103	-9.67939
2013	87	7	456.169	-9.63856
2013	87	8	460.206	-9.49235
2013	87	9	463.86	-9.36797
2013	87	10	456.857	-9.01898
2013	87	11	445.784	-8.93222
2013	87	12	436.519	-8.81128
2013	87	13	502.148	-10.6364
2013	87	14	438.573	-8.89142
2013	87	15	434.877	-8.57061
2013	87	16	435.364	-8.58933
2013	87	17	451.999	-9.73126
2013	87	18	431.799	-8.88082
2013	87	19	433.133	-8.81559
2013	87	20	439.701	-8.91191
2013	87	21	429.449	-8.5597
2013	87	22	439.363	-8.8879
2013	87	23	446.16	-9.60441
2013	87	24	441.856	-9.4725
2013	88	1	429.304	-9.0864
2013	88	2	423.865	-8.94973
2013	88	3	420.975	-8.81344
2013	88	4	419.002	-8.67413
2013	88	5	415.521	-8.42226
2013	88	6	425.659	-8.77187
2013	88	7	428.183	-8.71637
2013	88	8	428.704	-8.93296
2013	88	9	428.059	-8.94032
2013	88	10	423.917	-8.88096
2013	88	11	428.216	-8.85438
2013	88	12	435.381	-9.05132
2013	88	13	448.473	-9.37881
2013	88	14	461.764	-9.69807
2013	88	15	465.732	-9.79119
2013	88	16	452.965	-9.36278
2013	88	17	444.61	-9.59509
2013	88	18	448.615	-9.69518
2013	88	19	436.942	-9.27692
2013	88	20	435.11	-9.04086
2013	88	21	432.633	-8.66687
2013	88	22	427.146	-8.47282
2013	88	23	431.249	-8.9218
2013	88	24	433.354	-8.95204
2013	89	1	449.878	-9.51746
2013	89	2	432.405	-9.19459
2013	89	3	437.993	-9.30755
2013	89	4	452.446	-9.72685
2013	89	5	436.447	-9.20977
2013	89	6	440.766	-9.34559
2013	89	7	436.764	-9.17718
2013	89	8	479.17	-10.491
2013	89	9	466.416	-10.1686
2013	89	10	455.078	-9.66279
2013	89	11	462.541	-9.90127
2013	89	12	456.286	-9.84569
2013	89	13	451.374	-9.64457
2013	89	14	475.267	-10.2322
2013	89	15	470.245	-10.0525
2013	89	16	505.503	-11.0227
2013	89	17	456.52	-9.6444
2013	89	18	435.234	-9.00108
2013	89	19	422.758	-8.57241
2013	89	20	416.712	-7.92492
2013	89	21	405.96	-7.6677
2013	89	22	415.815	-8.02865
2013	89	23	417.053	-8.28891
2013	89	24	425.482	-8.74261
2013	90	1	439.701	-9.25227
2013	90	2	440.561	-9.6643
2013	90	3	436.78	-9.5939
2013	90	4	434.396	-9.61436
2013	90	5	419.274	-8.67156
2013	90	6	421.508	-8.6362
2013	90	7	429.255	-9.03604
2013	90	8	432.162	-8.71332
2013	90	9	433.294	-8.57851
2013	90	10	445.313	-8.87599
2013	90	11	461.864	-10.0691
2013	90	12	488.185	-10.8628
2013	90	13	436.947	-9.20636
2013	90	14	458.738	-9.7838
2013	90	15	461.502	-9.89421
2013	90	16	461.203	-9.78307
2013	90	17	447.566	-9.55564
2013	90	18	432.691	-9.01525
2013	90	19	435.44	-9.15267
2013	90	20	436.288	-8.93312
2013	90	21	459.735	-9.683
2013	90	22	452.913	-9.41468
2013	90	23	465.226	-9.99114
2013	90	24	442.245	-9.47197
2013	91	1	455.341	-9.92391
2013	91	2	456.294	-9.84625
2013	91	3	458.767	-9.90003
2013	91	4	489.521	-10.7932
2013	91	5	469.795	-10.205
2013	91	6	459.357	-9.94025
2013	91	7	481.209	-10.4973
2013	91	8	432.762	-8.99959
2013	91	9	433.747	-8.96003
2013	91	10	442.769	-9.1749
2013	91	11	447.417	-9.27198
2013	91	12	437.09	-8.99956
2013	91	13	429.311	-8.83464
2013	91	14	425.21	-8.01626
2013	91	15	424.92	-7.85255
2013	91	16	429.346	-7.96933
2013	91	17	426.502	-8.1444
2013	91	18	430.724	-8.25287
2013	91	19	454.554	-8.89096
2013	91	20	444.821	-8.85006
2013	91	21	433.981	-8.5999
2013	91	22	436.609	-8.75339
2013	91	23	422.187	-8.62144
2013	91	24	425.318	-8.77136
2013	92	1	427.39	-8.88565
2013	92	2	428.427	-8.96321
2013	92	3	429.94	-8.8991
2013	92	4	430.089	-8.85714
2013	92	5	428.595	-8.74935
2013	92	6	424.788	-8.43037
2013	92	7	427.123	-8.49821
2013	92	8	429.194	-8.95795
2013	92	9	427.463	-8.88354
2013	92	10	423.217	-8.65499
2013	92	11	419.784	-8.53281
2013	92	12	416.858	-8.37221
2013	92	13	413.424	-8.36021
2013	92	14	410.438	-7.88102
2013	92	15	407.946	-7.6522
2013	92	16	405.699	-7.52736
2013	92	17	406.344	-7.88016
2013	92	18	443.546	-9.36574
2013	92	19	437.391	-8.98892
2013	92	20	414.255	-8.30365
2013	92	21	427.999	-9.48631
2013	92	22	419.124	-8.61641
2013	92	23	435.619	-9.59286
2013	92	24	420.617	-8.99226
2013	93	1	430.515	-9.40875
2013	93	2	454.524	-9.63236
2013	93	3	445.804	-9.23262
2013	93	4	477.689	-10.5211
2013	93	5	491.625	-11.1151
2013	93	6	524.897	-12.1065
2013	93	7	513.483	-11.8136
2013	93	8	498.789	-11.4164
2013	93	9	472.141	-10.6401
2013	93	10	469.82	-10.4822
2013	93	11	-9999	-9999
2013	93	12	446.209	-9.56115
2013	93	13	438.124	-9.1385
2013	93	14	430.48	-8.8434
2013	93	15	421.82	-8.32369
2013	93	16	422.787	-8.35155
2013	93	17	434.984	-8.97921
2013	93	18	431.272	-8.71992
2013	93	19	431.339	-8.76901
2013	93	20	435.892	-8.838
2013	93	21	442.912	-9.05094
2013	93	22	435.703	-8.91908
2013	93	23	441.986	-9.16592
2013	93	24	452.701	-9.44773
2013	94	1	480.272	-10.3307
2013	94	2	461.154	-9.8292
2013	94	3	466.627	-10.2636
2013	94	4	448.636	-9.64855
2013	94	5	448.829	-9.65452
2013	94	6	453.25	-9.81802
2013	94	7	470.521	-10.4339
2013	94	8	480.401	-10.5108
2013	94	9	467.242	-10.076
2013	94	10	480.95	-10.4881
2013	94	11	477.959	-10.3172
2013	94	12	467.909	-10.0347
2013	94	13	443.785	-9.1859
2013	94	14	435.45	-8.9421
2013	94	15	444.402	-8.62059
2013	94	16	432.599	-8.16728
2013	94	17	438.981	-8.39107
2013	94	18	440.895	-8.76516
2013	94	19	423.934	-8.25443
2013	94	20	437.423	-8.6996
2013	94	21	453.179	-9.35372
2013	94	22	447.382	-9.1523
2013	94	23	454.019	-9.29391
2013	94	24	452.9	-9.24787
2013	95	1	452.28	-9.22265
2013	95	2	452.397	-9.26214
2013	95	3	447.398	-9.59286
2013	95	4	444.935	-9.46202
2013	95	5	438.598	-9.3841
2013	95	6	448.782	-9.16181
2013	95	7	444.248	-8.92536
2013	95	8	446.566	-9.16233
2013	95	9	440.462	-9.15391
2013	95	10	430.713	-8.83899
2013	95	11	426.074	-8.56825
2013	95	12	422.805	-8.2165
2013	95	13	420.735	-8.20792
2013	95	14	419.182	-8.02119
2013	95	15	417.29	-7.93902
2013	95	16	414.496	-7.81324
2013	95	17	409.981	-7.66189
2013	95	18	407.717	-7.30507
2013	95	19	407.611	-7.30171
2013	95	20	410.963	-7.50189
2013	95	21	409.286	-7.83279
2013	95	22	411.973	-7.96446
2013	95	23	417.593	-8.1824
2013	95	24	427.012	-8.74196
2013	96	1	421.788	-8.54024
2013	96	2	417.777	-8.35115
2013	96	3	414.301	-8.12818
2013	96	4	414.215	-8.17763
2013	96	5	414.374	-8.29191
2013	96	6	414.174	-8.10789
2013	96	7	416.802	-8.19144
2013	96	8	418.578	-8.35916
2013	96	9	420.003	-8.58922
2013	96	10	416.348	-8.46982
2013	96	11	411	-8.34197
2013	96	12	410.647	-8.45423
2013	96	13	409.732	-8.36854
2013	96	14	408.943	-8.31498
2013	96	15	406.61	-8.12276
2013	96	16	405.029	-8.15071
2013	96	17	404.628	-8.03099
2013	96	18	401.716	-7.70244
2013	96	19	401.577	-7.79041
2013	96	20	402.457	-7.78694
2013	96	21	405.443	-8.2997
2013	96	22	408.068	-8.52153
2013	96	23	410.988	-8.46002
2013	96	24	416.088	-8.97402
2013	97	1	416.193	-8.96429
2013	97	2	415.964	-9.02544
2013	97	3	414.165	-8.58532
2013	97	4	412.378	-8.46507
2013	97	5	411.364	-8.29663
2013	97	6	410.256	-8.10511
2013	97	7	410.875	-8.13913
2013	97	8	412.888	-8.27724
2013	97	9	415.045	-8.59494
2013	97	10	408.18	-8.30179
2013	97	11	405.29	-8.05218
2013	97	12	403.985	-8.18569
2013	97	13	405.954	-8.24321
2013	97	14	407.504	-8.21345
2013	97	15	413.851	-8.15798
2013	97	16	426.563	-8.65933
2013	97	17	423.216	-8.58385
2013	97	18	415.643	-8.22917
2013	97	19	420.032	-8.39238
2013	97	20	422.961	-8.33359
2013	97	21	431.853	-9.14699
2013	97	22	438.918	-9.34887
2013	97	23	435.046	-9.27895
2013	97	24	430.518	-8.61816
2013	98	1	437.465	-8.67476
2013	98	2	444.682	-8.91278
2013	98	3	447.651	-8.60301
2013	98	4	445.325	-8.78295
2013	98	5	447.788	-8.68382
2013	98	6	457.53	-8.95605
2013	98	7	442.645	-8.92885
2013	98	8	441.866	-8.85834
2013	98	9	446.51	-9.14561
2013	98	10	448.145	-9.24107
2013	98	11	445.387	-9.12775
2013	98	12	431.867	-8.28505
2013	98	13	420.076	-8.00098
2013	98	14	415.003	-7.72774
2013	98	15	408.851	-7.37682
2013	98	16	409.011	-7.519
2013	98	17	407.377	-7.51983
2013	98	18	402.162	-7.7553
2013	98	19	400.732	-7.73508
2013	98	20	401.713	-7.73817
2013	98	21	400.496	-7.41385
2013	98	22	402.623	-7.41542
2013	98	23	408.525	-7.88422
2013	98	24	420.973	-8.46496
2013	99	1	424.352	-8.5972
2013	99	2	422.2	-8.43279
2013	99	3	424.866	-8.46214
2013	99	4	436.417	-8.99861
2013	99	5	424.296	-8.43535
2013	99	6	424.536	-8.86502
2013	99	7	427.173	-9.07822
2013	99	8	430.006	-9.0198
2013	99	9	427.783	-9.26188
2013	99	10	426.082	-9.29855
2013	99	11	436.423	-9.55673
2013	99	12	417.791	-8.82349
2013	99	13	412.24	-8.46782
2013	99	14	407.163	-8.4987
2013	99	15	404.729	-8.20906
2013	99	16	404.462	-8.14159
2013	99	17	402.568	-8.12399
2013	99	18	402.423	-7.91264
2013	99	19	404.272	-8.08497
2013	99	20	402.3	-8.06819
2013	99	21	403.597	-7.93827
2013	99	22	404.986	-8.17537
2013	99	23	409.456	-8.33198
2013	99	24	412.027	-8.52264
2013	100	1	412.852	-8.44953
2013	100	2	413.466	-8.41147
2013	100	3	413.829	-8.44917
2013	100	4	413.07	-8.49375
2013	100	5	415.534	-8.56408
2013	100	6	418.25	-8.66007
2013	100	7	419.693	-8.61515
2013	100	8	421.915	-8.90798
2013	100	9	415.818	-8.79064
2013	100	10	420.114	-8.87705
2013	100	11	442.751	-9.60935
2013	100	12	431.051	-9.09656
2013	100	13	433.192	-9.23985
2013	100	14	412.557	-8.48716
2013	100	15	406.658	-8.33764
2013	100	16	405.518	-8.19126
2013	100	17	402.43	-8.21693
2013	100	18	398.987	-7.73897
2013	100	19	399.409	-7.5459
2013	100	20	402.493	-7.78819
2013	100	21	407.554	-7.97044
2013	100	22	408.8	-8.01659
2013	100	23	409.021	-8.06537
2013	100	24	411.333	-8.33333
2013	101	1	413.242	-8.39137
2013	101	2	413.977	-8.34021
2013	101	3	416.207	-8.74567
2013	101	4	418.146	-8.74707
2013	101	5	418.18	-8.78877
2013	101	6	421.104	-8.63215
2013	101	7	425.914	-8.78111
2013	101	8	427.905	-8.90966
2013	101	9	426.188	-9.03725
2013	101	10	427.031	-9.04457
2013	101	11	445.408	-9.75156
2013	101	12	434.129	-9.02543
2013	101	13	438.142	-9.15875
2013	101	14	423.009	-8.57048
2013	101	15	407.298	-8.00771
2013	101	16	407.924	-8.10264
2013	101	17	408.546	-8.04713
2013	101	18	405.402	-7.67097
2013	101	19	406.082	-7.66855
2013	101	20	414.392	-7.95031
2013	101	21	419.111	-7.92639
2013	101	22	418.833	-7.94062
2013	101	23	418.282	-7.97269
2013	101	24	416.171	-8.70629
2013	102	1	411.342	-8.52055
2013	102	2	408.082	-8.45231
2013	102	3	409.944	-8.39568
2013	102	4	415.168	-8.63201
2013	102	5	421.261	-8.85578
2013	102	6	419.936	-8.89452
2013	102	7	429.129	-9.44489
2013	102	8	440.564	-9.77452
2013	102	9	440.295	-9.5031
2013	102	10	453.658	-9.79517
2013	102	11	439.734	-9.39445
2013	102	12	429.523	-8.89417
2013	102	13	428.475	-8.82443
2013	102	14	422.024	-8.49198
2013	102	15	414.012	-7.93123
2013	102	16	410.948	-7.85221
2013	102	17	408.951	-7.74711
2013	102	18	404.259	-7.79107
2013	102	19	404.981	-7.57705
2013	102	20	409.119	-7.92073
2013	102	21	417.632	-8.25914
2013	102	22	425.325	-8.52092
2013	102	23	432.863	-8.80492
2013	102	24	430.388	-8.97186
2013	103	1	431.222	-9.06515
2013	103	2	427.027	-8.89452
2013	103	3	422.855	-8.67245
2013	103	4	428.326	-9.02567
2013	103	5	430.497	-9.09723
2013	103	6	433.812	-9.10358
2013	103	7	435.7	-9.27783
2013	103	8	436.927	-9.16518
2013	103	9	435.344	-9.06709
2013	103	10	431.372	-8.90221
2013	103	11	427.741	-8.68429
2013	103	12	414.873	-8.08801
2013	103	13	408.612	-7.97145
2013	103	14	405.92	-7.92877
2013	103	15	403.453	-7.56708
2013	103	16	400.843	-7.37028
2013	103	17	400.318	-7.31166
2013	103	18	400.734	-7.31509
2013	103	19	401.386	-7.44465
2013	103	20	405.546	-7.65936
2013	103	21	408.206	-7.72801
2013	103	22	407.409	-7.69681
2013	103	23	407.681	-7.58127
2013	103	24	410.132	-7.74405
2013	104	1	411.442	-7.77048
2013	104	2	415.798	-7.87482
2013	104	3	417.452	-8.03691
2013	104	4	419.1	-8.06577
2013	104	5	419.425	-8.13475
2013	104	6	421.169	-8.40388
2013	104	7	423.329	-8.42651
2013	104	8	424.218	-8.32034
2013	104	9	422.583	-8.25194
2013	104	10	418.655	-7.93272
2013	104	11	419.189	-8.05837
2013	104	12	408.943	-7.55796
2013	104	13	407.537	-7.59428
2013	104	14	407.648	-7.53527
2013	104	15	407.934	-7.54323
2013	104	16	408.091	-7.39651
2013	104	17	418.419	-7.98938
2013	104	18	415.781	-7.7503
2013	104	19	413.208	-7.69403
2013	104	20	410.892	-7.51731
2013	104	21	417.153	-8.11972
2013	104	22	424.842	-8.2933
2013	104	23	443.18	-9.05709
2013	104	24	483.696	-10.7153
2013	105	1	459.132	-9.94906
2013	105	2	434.69	-9.06328
2013	105	3	441.527	-9.04946
2013	105	4	432.045	-8.89004
2013	105	5	434.153	-8.85852
2013	105	6	435.519	-8.90119
2013	105	7	439.681	-8.88238
2013	105	8	453.746	-9.21997
2013	105	9	453.606	-9.11311
2013	105	10	443.519	-8.80508
2013	105	11	433.172	-8.37596
2013	105	12	419.158	-8.18514
2013	105	13	411.667	-7.91088
2013	105	14	407.115	-7.6817
2013	105	15	405.181	-7.01046
2013	105	16	403.067	-7.0089
2013	105	17	402.523	-7.013
2013	105	18	402.192	-7.33016
2013	105	19	401.852	-7.40762
2013	105	20	403.196	-7.47319
2013	105	21	410.986	-7.89939
2013	105	22	414.228	-8.01065
2013	105	23	414.197	-8.12614
2013	105	24	421.413	-8.39407
2013	106	1	425.123	-8.60305
2013	106	2	424.283	-8.58822
2013	106	3	426.81	-8.8683
2013	106	4	431.03	-8.97653
2013	106	5	426.773	-8.80513
2013	106	6	432.345	-8.91794
2013	106	7	440.753	-9.26813
2013	106	8	451.73	-9.5621
2013	106	9	447.693	-9.36785
2013	106	10	449.565	-9.36825
2013	106	11	441.986	-9.09541
2013	106	12	414.007	-8.36622
2013	106	13	411.039	-8.12721
2013	106	14	408.372	-8.15112
2013	106	15	406.863	-7.22145
2013	106	16	406.877	-7.29066
2013	106	17	406.926	-7.41069
2013	106	18	408.225	-6.99359
2013	106	19	407.354	-7.06678
2013	106	20	406.909	-7.12344
2013	106	21	414.133	-7.41143
2013	106	22	417.589	-7.57393
2013	106	23	428.552	-8.41478
2013	106	24	455.43	-9.85804
2013	107	1	446.158	-9.74309
2013	107	2	443.685	-9.66339
2013	107	3	445.873	-9.5646
2013	107	4	439.269	-9.40725
2013	107	5	439.533	-9.41003
2013	107	6	424.153	-8.89416
2013	107	7	427.908	-9.02045
2013	107	8	438.088	-9.43927
2013	107	9	448.713	-10.079
2013	107	10	469.264	-10.7371
2013	107	11	490.592	-10.9626
2013	107	12	507.258	-11.5661
2013	107	13	545.582	-12.287
2013	107	14	527.949	-11.8837
2013	107	15	502.18	-11.1096
2013	107	16	503.229	-11.0496
2013	107	17	506.161	-10.9757
2013	107	18	466.078	-9.59437
2013	107	19	445.495	-8.92912
2013	107	20	447.505	-9.18307
2013	107	21	443.832	-8.63836
2013	107	22	441.865	-8.49587
2013	107	23	450.335	-8.57635
2013	107	24	502.557	-10.8241
2013	108	1	462.493	-9.69565
2013	108	2	448.964	-9.35199
2013	108	3	463.476	-9.50037
2013	108	4	465.122	-9.56504
2013	108	5	456.573	-9.46021
2013	108	6	497.82	-11.6921
2013	108	7	457.711	-10.2414
2013	108	8	457	-10.326
2013	108	9	449.988	-9.5062
2013	108	10	473.026	-10.023
2013	108	11	435.029	-8.90651
2013	108	12	415.367	-8.63584
2013	108	13	415.651	-8.75232
2013	108	14	414.11	-8.68602
2013	108	15	408.758	-8.06582
2013	108	16	403.564	-7.81827
2013	108	17	407.452	-8.18128
2013	108	18	414.003	-8.37987
2013	108	19	416.311	-8.45492
2013	108	20	420.785	-8.62613
2013	108	21	427.909	-8.72084
2013	108	22	421.268	-8.58243
2013	108	23	418.831	-8.55126
2013	108	24	413.468	-8.76844
2013	109	1	412.56	-8.76254
2013	109	2	412.501	-8.7226
2013	109	3	410.155	-8.87016
2013	109	4	408.523	-8.8741
2013	109	5	408.468	-8.78516
2013	109	6	408.191	-8.20856
2013	109	7	409.275	-8.08246
2013	109	8	413.887	-8.37732
2013	109	9	412.85	-8.30643
2013	109	10	421.022	-8.70559
2013	109	11	420.799	-8.5431
2013	109	12	422.511	-8.81168
2013	109	13	424.734	-8.68035
2013	109	14	441.469	-9.14809
2013	109	15	413.902	-8.21132
2013	109	16	431.228	-8.80073
2013	109	17	414.639	-8.23125
2013	109	18	409.911	-8.18561
2013	109	19	410.991	-8.24391
2013	109	20	406.014	-8.02557
2013	109	21	405.236	-8.04585
2013	109	22	410.925	-8.23981
2013	109	23	415.781	-8.7108
2013	109	24	423.187	-8.79322
2013	110	1	411.879	-8.43217
2013	110	2	410.17	-8.31705
2013	110	3	411.128	-9.04496
2013	110	4	411.814	-8.96896
2013	110	5	411.811	-8.97392
2013	110	6	412.762	-8.43031
2013	110	7	412.313	-8.50183
2013	110	8	412.398	-8.44796
2013	110	9	412.12	-8.1755
2013	110	10	409.889	-7.96314
2013	110	11	408.63	-7.8205
2013	110	12	407.369	-8.15522
2013	110	13	405.783	-8.12297
2013	110	14	403.951	-7.97743
2013	110	15	403.156	-7.87536
2013	110	16	404.367	-7.83075
2013	110	17	403.946	-7.79192
2013	110	18	403.213	-8.01207
2013	110	19	404.113	-7.93672
2013	110	20	405.4	-8.22806
2013	110	21	405.886	-7.51121
2013	110	22	406.636	-7.59862
2013	110	23	408.088	-7.66311
2013	110	24	408.729	-8.15887
2013	111	1	409.921	-8.25012
2013	111	2	410.068	-8.25401
2013	111	3	411.095	-8.31034
2013	111	4	413.279	-8.37594
2013	111	5	417.509	-8.57665
2013	111	6	416.701	-8.12417
2013	111	7	429.635	-8.64736
2013	111	8	440.026	-9.32333
2013	111	9	419.451	-8.48729
2013	111	10	443.415	-9.66078
2013	111	11	438.014	-9.3918
2013	111	12	466.071	-10.0424
2013	111	13	452.445	-9.65138
2013	111	14	454.898	-9.7421
2013	111	15	455.494	-9.96433
2013	111	16	453.296	-10.0204
2013	111	17	445.484	-9.80765
2013	111	18	440.499	-9.05872
2013	111	19	420.054	-8.37527
2013	111	20	420.113	-8.3411
2013	111	21	424.147	-8.64623
2013	111	22	445.628	-9.41243
2013	111	23	436.58	-9.11411
2013	111	24	476.011	-10.8303
2013	112	1	459.705	-10.1847
2013	112	2	484.421	-11.0659
2013	112	3	448.614	-9.55263
2013	112	4	448.228	-9.50152
2013	112	5	462.278	-9.99739
2013	112	6	470.603	-10.1176
2013	112	7	488.731	-10.5733
2013	112	8	464.179	-9.98076
2013	112	9	462.669	-10.5984
2013	112	10	447.601	-9.97442
2013	112	11	444.645	-9.80936
2013	112	12	431.138	-8.97291
2013	112	13	437.893	-9.14541
2013	112	14	437.038	-9.25781
2013	112	15	434.253	-9.23692
2013	112	16	434.512	-9.27325
2013	112	17	441.924	-9.54776
2013	112	18	441.425	-9.28148
2013	112	19	458.876	-9.99469
2013	112	20	459.307	-9.99537
2013	112	21	444.136	-9.47194
2013	112	22	452.842	-9.607
2013	112	23	439.538	-9.18113
2013	112	24	442.829	-9.59764
2013	113	1	437.298	-9.36664
2013	113	2	435.832	-9.44842
2013	113	3	434.709	-8.80293
2013	113	4	437.406	-8.89595
2013	113	5	437.941	-8.85371
2013	113	6	439.763	-9.22388
2013	113	7	436.003	-9.00515
2013	113	8	431.418	-8.74355
2013	113	9	428.209	-8.88163
2013	113	10	424.479	-8.6873
2013	113	11	422.126	-8.52546
2013	113	12	418.62	-7.94423
2013	113	13	417.033	-7.91147
2013	113	14	415.305	-7.82593
2013	113	15	412.859	-8.39236
2013	113	16	412.81	-8.2709
2013	113	17	413.732	-8.33698
2013	113	18	419.05	-8.11202
2013	113	19	417.972	-8.04804
2013	113	20	416.088	-7.90296
2013	113	21	422.3	-8.51971
2013	113	22	430.971	-8.76989
2013	113	23	434.34	-9.10231
2013	113	24	442.387	-9.1415
2013	114	1	444.493	-9.26799
2013	114	2	433.83	-8.85954
2013	114	3	434.701	-9.00703
2013	114	4	449.485	-9.59474
2013	114	5	455.886	-9.86731
2013	114	6	455.428	-10.1735
2013	114	7	446.96	-9.78346
2013	114	8	447.261	-9.79632
2013	114	9	426.58	-8.27962
2013	114	10	419.364	-8.04786
2013	114	11	416.738	-7.97584
2013	114	12	411.464	-7.97822
2013	114	13	406.398	-7.81493
2013	114	14	405.272	-7.64497
2013	114	15	403.503	-6.93795
2013	114	16	399.985	-6.79882
2013	114	17	399.88	-6.86246
2013	114	18	404.302	-7.11967
2013	114	19	407.316	-7.33792
2013	114	20	415.521	-7.71236
2013	114	21	429.03	-8.40104
2013	114	22	436.342	-8.63987
2013	114	23	450.891	-9.38738
2013	114	24	449.711	-9.24564
2013	115	1	435.638	-8.66268
2013	115	2	448.837	-9.35932
2013	115	3	448.81	-9.18729
2013	115	4	439.367	-8.79652
2013	115	5	440.192	-8.8621
2013	115	6	443.871	-9.1398
2013	115	7	447.923	-9.36627
2013	115	8	449.931	-9.33018
2013	115	9	442.851	-8.75087
2013	115	10	432.702	-8.17069
2013	115	11	420.878	-8.07542
2013	115	12	415.225	-7.78298
2013	115	13	411.886	-7.69843
2013	115	14	410.529	-7.72417
2013	115	15	406.322	-7.43892
2013	115	16	402.597	-7.41818
2013	115	17	400.95	-7.40353
2013	115	18	402.146	-7.35655
2013	115	19	403.19	-7.32817
2013	115	20	403.278	-7.49121
2013	115	21	404.748	-7.39478
2013	115	22	408.059	-7.66081
2013	115	23	409.399	-7.64561
2013	115	24	415.502	-8.47033
2013	116	1	447.634	-9.47521
2013	116	2	467.736	-9.98391
2013	116	3	482.81	-10.699
2013	116	4	441.787	-9.44019
2013	116	5	440.633	-9.36293
2013	116	6	448.026	-9.76822
2013	116	7	448.057	-9.77825
2013	116	8	444.708	-9.54663
2013	116	9	451.711	-9.49278
2013	116	10	446.561	-9.32848
2013	116	11	444.526	-9.12991
2013	116	12	427.061	-8.29556
2013	116	13	418.493	-8.05369
2013	116	14	415.119	-7.92615
2013	116	15	416.012	-8.18984
2013	116	16	421.81	-8.50335
2013	116	17	414.715	-8.15529
2013	116	18	412.207	-8.20036
2013	116	19	411.115	-8.16142
2013	116	20	421.425	-8.58224
2013	116	21	448.905	-9.00935
2013	116	22	465.914	-9.48931
2013	116	23	455.785	-9.38688
2013	116	24	457.498	-9.2763
2013	117	1	448.393	-9.28544
2013	117	2	438.878	-8.89238
2013	117	3	444.314	-9.12114
2013	117	4	444.807	-9.19964
2013	117	5	443.021	-9.08415
2013	117	6	444.285	-9.39172
2013	117	7	452.176	-9.62472
2013	117	8	455.1	-9.7691
2013	117	9	454.374	-9.33675
2013	117	10	459.886	-9.53892
2013	117	11	461.008	-9.25638
2013	117	12	431.405	-8.55026
2013	117	13	425.162	-8.52197
2013	117	14	418.825	-8.2069
2013	117	15	412.474	-7.6653
2013	117	16	412.269	-7.50521
2013	117	17	405.751	-7.20733
2013	117	18	405.619	-7.30632
2013	117	19	408.387	-7.29504
2013	117	20	415.154	-7.69959
2013	117	21	423.258	-8.1097
2013	117	22	437.662	-8.53408
2013	117	23	456.563	-9.45394
2013	117	24	449.397	-9.21088
2013	118	1	453.511	-9.01986
2013	118	2	460.694	-9.54005
2013	118	3	458.089	-9.59666
2013	118	4	451.098	-9.44
2013	118	5	459.641	-9.74089
2013	118	6	464.701	-10.0453
2013	118	7	468.461	-9.77436
2013	118	8	460.745	-9.68773
2013	118	9	458.647	-9.70662
2013	118	10	451.304	-9.42102
2013	118	11	445.947	-9.11199
2013	118	12	436.028	-8.32576
2013	118	13	435.127	-8.32716
2013	118	14	426.406	-7.99231
2013	118	15	422.1	-7.73028
2013	118	16	423.164	-7.64582
2013	118	17	423.815	-7.78293
2013	118	18	425.798	-8.00235
2013	118	19	426.254	-8.05284
2013	118	20	424.718	-8.17012
2013	118	21	426.421	-8.63487
2013	118	22	431.925	-8.80557
2013	118	23	448.057	-9.16511
2013	118	24	457.991	-9.21998
2013	119	1	453.042	-9.31919
2013	119	2	439.312	-8.85135
2013	119	3	437.423	-8.60685
2013	119	4	441.8	-8.86679
2013	119	5	445.976	-9.14654
2013	119	6	449.461	-8.87947
2013	119	7	451.644	-8.8974
2013	119	8	458.719	-9.22742
2013	119	9	465.113	-9.83985
2013	119	10	436.37	-9.25357
2013	119	11	419.735	-8.85322
2013	119	12	416.578	-8.51767
2013	119	13	410.4	-8.3357
2013	119	14	411.093	-8.36186
2013	119	15	407.783	-7.60042
2013	119	16	406.145	-7.52288
2013	119	17	406.098	-7.58584
2013	119	18	408.231	-8.31837
2013	119	19	403.512	-7.99371
2013	119	20	405.902	-7.93385
2013	119	21	413.161	-8.72141
2013	119	22	415.976	-8.86107
2013	119	23	418.27	-8.99519
2013	119	24	422.528	-9.11471
2013	120	1	429.597	-9.30115
2013	120	2	423.524	-8.99279
2013	120	3	428.656	-8.98985
2013	120	4	427.219	-8.78909
2013	120	5	435.698	-9.13015
2013	120	6	434.282	-9.21815
2013	120	7	432.091	-9.17606
2013	120	8	423.957	-8.70286
2013	120	9	424.774	-9.08474
2013	120	10	420.648	-8.81841
2013	120	11	418.32	-8.7075
2013	120	12	416.289	-8.61989
2013	120	13	430.349	-9.04498
2013	120	14	410.388	-8.18454
2013	120	15	403.256	-7.81205
2013	120	16	401.315	-7.6829
2013	120	17	399.104	-7.55982
2013	120	18	397.768	-6.98878
2013	120	19	397.842	-7.12852
2013	120	20	399.581	-7.22037
2013	120	21	411.106	-7.8926
2013	120	22	414.19	-8.0782
2013	120	23	423.192	-8.65838
2013	120	24	425.849	-9.02886
2013	121	1	428.927	-9.21285
2013	121	2	442.685	-9.60529
2013	121	3	485.868	-11.1077
2013	121	4	430.139	-9.08168
2013	121	5	482.522	-11.1145
2013	121	6	441.75	-9.5043
2013	121	7	433.061	-9.3497
2013	121	8	441.188	-9.6161
2013	121	9	444.324	-9.54414
2013	121	10	449.746	-9.81999
2013	121	11	461.93	-9.9754
2013	121	12	467.228	-10.2211
2013	121	13	452.664	-9.7097
2013	121	14	465.108	-10.0165
2013	121	15	462.147	-9.73633
2013	121	16	467.338	-9.78696
2013	121	17	480.236	-10.1584
2013	121	18	434.982	-8.7295
2013	121	19	433.558	-8.63697
2013	121	20	437.196	-8.96377
2013	121	21	416.784	-8.18157
2013	121	22	423.564	-8.48417
2013	121	23	448.281	-9.45376
2013	121	24	469.155	-10.1375
2013	122	1	468.056	-10.2856
2013	122	2	442.975	-9.56306
2013	122	3	466.804	-10.4259
2013	122	4	461.739	-10.1878
2013	122	5	445.463	-9.42846
2013	122	6	448.076	-9.45968
2013	122	7	450.234	-9.46494
2013	122	8	452.559	-9.50116
2013	122	9	448.534	-9.54588
2013	122	10	453.163	-9.68623
2013	122	11	453.277	-9.64977
2013	122	12	429.091	-9.11156
2013	122	13	428.922	-9.09459
2013	122	14	431.011	-8.9746
2013	122	15	430.665	-8.68638
2013	122	16	434.475	-8.7581
2013	122	17	430.557	-8.91447
2013	122	18	425.611	-8.63725
2013	122	19	457.788	-9.55016
2013	122	20	490.243	-10.6172
2013	122	21	479.183	-10.3216
2013	122	22	459.181	-9.84328
2013	122	23	445.236	-9.53661
2013	122	24	454.948	-9.71606
2013	123	1	468.977	-10.0674
2013	123	2	468.399	-10.2813
2013	123	3	501.23	-11.0899
2013	123	4	484.192	-10.5513
2013	123	5	490.839	-10.8962
2013	123	6	479.905	-10.9364
2013	123	7	453.147	-9.89609
2013	123	8	465.892	-10.2298
2013	123	9	452.679	-9.36432
2013	123	10	475.63	-10.0267
2013	123	11	446.318	-8.97468
2013	123	12	435.006	-8.95812
2013	123	13	430.799	-8.75442
2013	123	14	424.228	-8.44108
2013	123	15	416.789	-7.62903
2013	123	16	413.172	-7.43973
2013	123	17	414.707	-7.55519
2013	123	18	416.576	-7.66504
2013	123	19	410.956	-7.39134
2013	123	20	415.648	-7.68804
2013	123	21	460.919	-9.47717
2013	123	22	445.19	-8.97849
2013	123	23	480.98	-10.2429
2013	123	24	481.161	-10.3621
2013	124	1	459.025	-9.68401
2013	124	2	492.08	-11.0236
2013	124	3	468.975	-10.1875
2013	124	4	484.752	-10.7648
2013	124	5	478.789	-10.54
2013	124	6	465.01	-10.0361
2013	124	7	456.724	-9.79144
2013	124	8	453.476	-9.48343
2013	124	9	448.642	-9.73689
2013	124	10	446.723	-9.60084
2013	124	11	444.289	-9.50452
2013	124	12	433.261	-8.99876
2013	124	13	437.542	-9.21649
2013	124	14	457.574	-9.88601
2013	124	15	448.028	-9.43341
2013	124	16	437.867	-8.94259
2013	124	17	436.315	-8.84896
2013	124	18	428.009	-8.07652
2013	124	19	418.756	-7.91988
2013	124	20	424.833	-8.05177
2013	124	21	420.86	-8.16996
2013	124	22	431.403	-8.6236
2013	124	23	464.599	-9.95917
2013	124	24	452.758	-9.74576
2013	125	1	472.953	-10.4718
2013	125	2	443.916	-9.53374
2013	125	3	470.852	-10.4623
2013	125	4	483.883	-10.8215
2013	125	5	503.475	-11.5119
2013	125	6	501.507	-11.2224
2013	125	7	513.928	-11.5796
2013	125	8	506.943	-11.4863
2013	125	9	486.218	-10.6818
2013	125	10	474.36	-10.3159
2013	125	11	459.544	-9.72792
2013	125	12	462.837	-9.81518
2013	125	13	463.394	-9.60563
2013	125	14	437.847	-8.84014
2013	125	15	449.449	-9.11726
2013	125	16	442.047	-8.95356
2013	125	17	433.583	-8.65151
2013	125	18	448.54	-9.21316
2013	125	19	447.833	-9.17258
2013	125	20	466.708	-9.77077
2013	125	21	463.384	-9.53624
2013	125	22	506.373	-10.5874
2013	125	23	519.824	-10.8716
2013	125	24	518.104	-11.1218
2013	126	1	463.328	-9.57882
2013	126	2	485.234	-10.4001
2013	126	3	455.779	-9.78759
2013	126	4	480.311	-10.4508
2013	126	5	533.331	-11.8369
2013	126	6	517.291	-11.2432
2013	126	7	499.886	-10.7535
2013	126	8	507.823	-10.9947
2013	126	9	509.079	-10.9948
2013	126	10	530.766	-11.5111
2013	126	11	510.109	-11.0145
2013	126	12	485.839	-10.4118
2013	126	13	458.348	-9.69074
2013	126	14	444.26	-9.19228
2013	126	15	460.84	-9.248
2013	126	16	446.162	-8.68543
2013	126	17	461.336	-9.13924
2013	126	18	460.01	-9.7645
2013	126	19	455.717	-9.68932
2013	126	20	459.96	-9.71065
2013	126	21	488.83	-10.086
2013	126	22	454.06	-8.93814
2013	126	23	439.033	-8.41609
2013	126	24	436.655	-8.65792
2013	127	1	439.532	-8.9194
2013	127	2	435.64	-8.76127
2013	127	3	431.152	-8.7897
2013	127	4	436.111	-8.98761
2013	127	5	448.055	-9.31973
2013	127	6	464.844	-9.60971
2013	127	7	478.713	-10.0231
2013	127	8	472.62	-9.71523
2013	127	9	461.866	-9.80596
2013	127	10	450.726	-9.52006
2013	127	11	450.889	-9.43865
2013	127	12	440.352	-8.87326
2013	127	13	437.51	-8.84312
2013	127	14	425.633	-8.40645
2013	127	15	425.07	-8.04358
2013	127	16	432.139	-8.42217
2013	127	17	426.16	-8.29029
2013	127	18	420.054	-8.01545
2013	127	19	432.293	-8.47654
2013	127	20	457.672	-9.17564
2013	127	21	442.301	-8.71716
2013	127	22	437.297	-8.54207
2013	127	23	431.604	-8.53333
2013	127	24	425.696	-8.72699
2013	128	1	423.79	-8.73152
2013	128	2	442.657	-9.39595
2013	128	3	435.407	-8.96939
2013	128	4	432.85	-8.7708
2013	128	5	432.508	-8.98416
2013	128	6	435.311	-8.80293
2013	128	7	433.18	-8.6507
2013	128	8	432.461	-8.6569
2013	128	9	437.131	-9.0678
2013	128	10	446.867	-9.44767
2013	128	11	493.155	-10.8209
2013	128	12	503.883	-10.6678
2013	128	13	482.541	-10.2823
2013	128	14	448.959	-9.08209
2013	128	15	478.294	-9.65033
2013	128	16	468.07	-9.44279
2013	128	17	465.132	-9.42459
2013	128	18	440.307	-8.84938
2013	128	19	441.075	-9.01359
2013	128	20	441.809	-8.91322
2013	128	21	453.194	-9.08668
2013	128	22	470.008	-9.63805
2013	128	23	476.549	-9.69397
2013	128	24	453.243	-9.00467
2013	129	1	450.564	-8.86794
2013	129	2	457.767	-9.33666
2013	129	3	459.459	-9.09418
2013	129	4	474.337	-9.79801
2013	129	5	475.641	-9.87518
2013	129	6	476.051	-9.64201
2013	129	7	493.715	-10.4661
2013	129	8	495.152	-10.7047
2013	129	9	485.343	-10.0139
2013	129	10	473.487	-9.67413
2013	129	11	461.464	-9.16886
2013	129	12	454.503	-8.9596
2013	129	13	447.585	-8.953
2013	129	14	447.124	-8.80716
2013	129	15	446.032	-8.80233
2013	129	16	442.967	-8.6251
2013	129	17	439.065	-8.65242
2013	129	18	433.559	-8.27176
2013	129	19	430.694	-8.2711
2013	129	20	429.145	-8.22947
2013	129	21	427.261	-7.84493
2013	129	22	433.649	-8.06866
2013	129	23	441.83	-8.2416
2013	129	24	444.609	-8.73412
2013	130	1	-9999	-9999
2013	130	2	-9999	-9999
2013	130	3	-9999	-9999
2013	130	4	-9999	-9999
2013	130	5	-9999	-9999
2013	130	6	-9999	-9999
2013	130	7	-9999	-9999
2013	130	8	-9999	-9999
2013	130	9	-9999	-9999
2013	130	10	-9999	-9999
2013	130	11	-9999	-9999
2013	130	12	-9999	-9999
2013	130	13	-9999	-9999
2013	130	14	-9999	-9999
2013	130	15	-9999	-9999
2013	130	16	-9999	-9999
2013	130	17	-9999	-9999
2013	130	18	-9999	-9999
2013	130	19	-9999	-9999
2013	130	20	-9999	-9999
2013	130	21	-9999	-9999
2013	130	22	-9999	-9999
2013	130	23	-9999	-9999
2013	130	24	-9999	-9999
2013	131	1	-9999	-9999
2013	131	2	-9999	-9999
2013	131	3	-9999	-9999
2013	131	4	-9999	-9999
2013	131	5	-9999	-9999
2013	131	6	-9999	-9999
2013	131	7	-9999	-9999
2013	131	8	-9999	-9999
2013	131	9	-9999	-9999
2013	131	10	-9999	-9999
2013	131	11	-9999	-9999
2013	131	12	-9999	-9999
2013	131	13	-9999	-9999
2013	131	14	-9999	-9999
2013	131	15	-9999	-9999
2013	131	16	-9999	-9999
2013	131	17	-9999	-9999
2013	131	18	-9999	-9999
2013	131	19	-9999	-9999
2013	131	20	-9999	-9999
2013	131	21	-9999	-9999
2013	131	22	-9999	-9999
2013	131	23	-9999	-9999
2013	131	24	-9999	-9999
2013	132	1	-9999	-9999
2013	132	2	-9999	-9999
2013	132	3	-9999	-9999
2013	132	4	-9999	-9999
2013	132	5	-9999	-9999
2013	132	6	-9999	-9999
2013	132	7	-9999	-9999
2013	132	8	-9999	-9999
2013	132	9	-9999	-9999
2013	132	10	-9999	-9999
2013	132	11	-9999	-9999
2013	132	12	-9999	-9999
2013	132	13	-9999	-9999
2013	132	14	-9999	-9999
2013	132	15	-9999	-9999
2013	132	16	-9999	-9999
2013	132	17	-9999	-9999
2013	132	18	-9999	-9999
2013	132	19	-9999	-9999
2013	132	20	-9999	-9999
2013	132	21	-9999	-9999
2013	132	22	-9999	-9999
2013	132	23	-9999	-9999
2013	132	24	-9999	-9999
2013	133	1	-9999	-9999
2013	133	2	-9999	-9999
2013	133	3	-9999	-9999
2013	133	4	-9999	-9999
2013	133	5	-9999	-9999
2013	133	6	-9999	-9999
2013	133	7	-9999	-9999
2013	133	8	-9999	-9999
2013	133	9	-9999	-9999
2013	133	10	-9999	-9999
2013	133	11	-9999	-9999
2013	133	12	-9999	-9999
2013	133	13	-9999	-9999
2013	133	14	-9999	-9999
2013	133	15	-9999	-9999
2013	133	16	-9999	-9999
2013	133	17	-9999	-9999
2013	133	18	-9999	-9999
2013	133	19	-9999	-9999
2013	133	20	-9999	-9999
2013	133	21	-9999	-9999
2013	133	22	-9999	-9999
2013	133	23	-9999	-9999
2013	133	24	-9999	-9999
2013	134	1	-9999	-9999
2013	134	2	-9999	-9999
2013	134	3	-9999	-9999
2013	134	4	-9999	-9999
2013	134	5	-9999	-9999
2013	134	6	-9999	-9999
2013	134	7	-9999	-9999
2013	134	8	-9999	-9999
2013	134	9	-9999	-9999
2013	134	10	-9999	-9999
2013	134	11	-9999	-9999
2013	134	12	-9999	-9999
2013	134	13	-9999	-9999
2013	134	14	-9999	-9999
2013	134	15	-9999	-9999
2013	134	16	-9999	-9999
2013	134	17	-9999	-9999
2013	134	18	-9999	-9999
2013	134	19	-9999	-9999
2013	134	20	-9999	-9999
2013	134	21	-9999	-9999
2013	134	22	-9999	-9999
2013	134	23	-9999	-9999
2013	134	24	-9999	-9999
2013	135	1	499.972	-10.8271
2013	135	2	532.922	-11.8876
2013	135	3	521.729	-11.4444
2013	135	4	523.668	-11.596
2013	135	5	492.869	-10.5918
2013	135	6	499.209	-10.9537
2013	135	7	494.358	-10.7253
2013	135	8	509.656	-11.4705
2013	135	9	472.881	-10.0987
2013	135	10	444.274	-9.59617
2013	135	11	437.439	-9.38969
2013	135	12	440.359	-9.53181
2013	135	13	438.106	-9.43311
2013	135	14	420.927	-8.48984
2013	135	15	409.971	-7.90075
2013	135	16	407.421	-7.74051
2013	135	17	404.924	-7.75054
2013	135	18	407.84	-7.80946
2013	135	19	410.197	-7.93684
2013	135	20	411.542	-7.81669
2013	135	21	413.191	-7.7676
2013	135	22	411.465	-7.59665
2013	135	23	411.34	-7.79969
2013	135	24	412.688	-8.02973
2013	136	1	416.953	-8.29972
2013	136	2	420.408	-8.48867
2013	136	3	422.762	-8.5756
2013	136	4	432.3	-9.00623
2013	136	5	422.806	-8.82149
2013	136	6	433.849	-9.31813
2013	136	7	445.668	-9.56204
2013	136	8	440.59	-9.44755
2013	136	9	432.727	-9.16527
2013	136	10	437.672	-9.03293
2013	136	11	435.952	-9.06708
2013	136	12	421.582	-8.36954
2013	136	13	417.522	-8.12389
2013	136	14	428.171	-8.58831
2013	136	15	408.073	-7.69407
2013	136	16	406.901	-7.47993
2013	136	17	408.022	-7.63862
2013	136	18	414.769	-8.15338
2013	136	19	427.868	-8.52103
2013	136	20	428.108	-8.60142
2013	136	21	441.187	-9.21496
2013	136	22	442.756	-9.34089
2013	136	23	438.927	-9.31541
2013	136	24	420.249	-8.7217
2013	137	1	427.79	-9.03623
2013	137	2	425.172	-8.63298
2013	137	3	422.427	-8.10665
2013	137	4	419.701	-8.08005
2013	137	5	421.148	-8.32008
2013	137	6	425.344	-8.78964
2013	137	7	429.567	-8.96725
2013	137	8	432.01	-8.83527
2013	137	9	431.959	-8.77729
2013	137	10	436.366	-8.91456
2013	137	11	447.108	-9.16874
2013	137	12	449.314	-9.18561
2013	137	13	441.366	-8.98395
2013	137	14	457.813	-9.27232
2013	137	15	460.431	-8.90175
2013	137	16	462.663	-8.96288
2013	137	17	458.572	-9.37917
2013	137	18	447.378	-9.42639
2013	137	19	448.65	-9.40669
2013	137	20	459.438	-9.50416
2013	137	21	463.742	-9.29488
2013	137	22	472.093	-9.63076
2013	137	23	443.652	-8.89276
2013	137	24	428.586	-8.64371
2013	138	1	434.668	-8.70631
2013	138	2	441.463	-8.54012
2013	138	3	440.461	-8.38035
2013	138	4	446.39	-8.59054
2013	138	5	442.318	-8.44745
2013	138	6	436.023	-8.33293
2013	138	7	441.847	-8.59452
2013	138	8	451.951	-8.80989
2013	138	9	457.969	-8.87477
2013	138	10	465.091	-8.86771
2013	138	11	452.146	-8.70505
2013	138	12	446.659	-8.31274
2013	138	13	439.032	-8.07726
2013	138	14	433.443	-8.11779
2013	138	15	430.583	-8.30872
2013	138	16	430.28	-8.28199
2013	138	17	428.043	-8.3112
2013	138	18	426.371	-8.37549
2013	138	19	419.901	-7.93721
2013	138	20	424.588	-8.15659
2013	138	21	429.498	-8.33519
2013	138	22	431.584	-8.42898
2013	138	23	432.573	-8.54226
2013	138	24	436.026	-8.9526
2013	139	1	439.592	-8.89807
2013	139	2	438.381	-8.87863
2013	139	3	437.699	-8.9847
2013	139	4	441.36	-9.17173
2013	139	5	446.052	-9.30825
2013	139	6	441.537	-9.13971
2013	139	7	428.245	-8.54916
2013	139	8	418.248	-7.81894
2013	139	9	413.034	-7.4977
2013	139	10	409.19	-7.15709
2013	139	11	405.398	-7.15485
2013	139	12	403.833	-7.36715
2013	139	13	402.843	-7.10743
2013	139	14	403.723	-7.44058
2013	139	15	402.015	-7.80268
2013	139	16	400.191	-7.69439
2013	139	17	402.131	-7.40616
2013	139	18	406.568	-7.22932
2013	139	19	414.827	-7.39879
2013	139	20	417.778	-7.65744
2013	139	21	419.364	-7.76885
2013	139	22	426.812	-8.04485
2013	139	23	428.976	-8.17907
2013	139	24	436.647	-8.37401
2013	140	1	437.71	-8.42602
2013	140	2	438.28	-8.54341
2013	140	3	442.618	-8.81125
2013	140	4	444.247	-8.9891
2013	140	5	451.44	-9.37627
2013	140	6	457.613	-9.61146
[truncated: 20,321 more rows]

## Sheet: Description
label	Unit	Description
Year	a	Year
DOY	d	Day of year （Julia day）
Hour ending	hr	Ending time Local Time (Beijing time +8)
Total CO2	ppm	Total CO2 volume mixing ratio	calibrated
δ13C	‰	13C/12C ratio in delta notation in reference to VPDB scale	calibrated and corrected for water vapor interference
Column 1: Year
Column 2: Day of year
Column 3: Local time ending (Beijing time)
Column 4: molar ratio of total CO2 (12C and 13C) to dry air (calibrated, ppm; gaps filled with -9999)
Column 5: 13C/12C ratio in delta notation in reference to VPDB scale (calibrated and corrected for water vapor interference, per mil, gaps filled with -9999)
